# Supplementary material for: HiTIMED: hierarchical tumor immune microenvironment epigenetic deconvolution for accurate cell type resolution in the tumor microenvironment using tumor-type-specific DNA methylation data
Source: Springer Nature journal article supplement (doi:10.1186/s12967-022-03736-6), 2022-11-08
Supplement: MOESM1 [file 23689358]

| Sample                                                           | N    | Mean Age (SD) | Male N (%)  | White N (%) | Black N (%) | Asian N (%) | Unreported Race N (%) | Other Race N (%) | Stage I N (%) | Stage II N (%) | Stage III N (%) | Stage IV N (%) | Unreported Stage N (%) | Data Source                        |
|------------------------------------------------------------------|------|---------------|-------------|-------------|-------------|-------------|-----------------------|------------------|---------------|----------------|-----------------|----------------|------------------------|------------------------------------|
| Bladder urothelial carcinoma (muscle invasive)                   | 412  | 68 (10.6)     | 304 (73.8)  | 327 (79.4)  | 23 (5.6)    | 44 (10.7)   | 18 (4.4)              | 0 (0)            | 2 (0.5)       | 131 (32.0)     | 141 (34.4)      | 136 (33.2)     | 2 (0.5)                | TCGA                               |
| Normal bladder                                                   | 21   | 69 (11.7)     | 11 (52.4)   | 18 (85.7)   | 2 (9.5)     | 0 (0)       | 1 (4.8)               | 0 (0)            | --            | --             | --              | --             | --                     | TCGA                               |
| Breast invasive carcinoma                                        | 784  | 58 (13.2)     | 9 (1.1)     | 569 (72.6)  | 160 (20.4)  | 38 (4.8)    | 16 (2.0)              | 1 (0.1)          | 127 (16.5)    | 436 (56.5)     | 198 (25.6)      | 11 (1.4)       | 12 (1.5)               | TCGA                               |
| Normal breast                                                    | 97   | 58 (15.2)     | 0 (0)       | 91 (93.8)   | 4 (4.1)     | 1 (1.0)     | 1 (1.0)               | 0 (0)            | --            | --             | --              | --             | --                     | TCGA                               |
| Cervical squamous cell carcinoma and endocervical adenocarcinoma | 307  | 48 (13.79)    | 0 (0)       | 211 (68.7)  | 30 (9.8)    | 20 (6.5)    | 36 (11.7)             | 10 (3.3)         | NA            | NA             | NA              | NA             | NA                     | TCGA                               |
| Normal cervix                                                    | 20   | 35 (13.33)    | 0 (0)       | NA          | NA          | NA          | NA                    | NA               | --            | --             | --              | --             | --                     | GSE46306                           |
| Cholangiocarcinoma                                               | 36   | 63 (12.9)     | 16 (44.4)   | 31 (86.1)   | 2 (5.6)     | 3 (8.3)     | 0 (0)                 | 0 (0)            | 19 (52.8)     | 9 (25.0)       | 1 (2.8)         | 7 (19.4)       | 0 (0)                  | TCGA                               |
| Normal bile duct                                                 | 9    | 71 (8.9)      | 6 (66.7)    | 9 (100.0)   | 0 (0)       | 0 (0)       | 0 (0)                 | 0 (0)            | --            | --             | --              | --             | --                     | TCGA                               |
| Colon adenocarcinoma                                             | 284  | 65 (13.4)     | 149 (52.5)  | 194 (68.3)  | 58 (20.4)   | 11 (3.9)    | 20 (7.0)              | 1 (0.4)          | 43 (15.7)     | 109 (39.8)     | 81 (29.6)       | 41 (15.0)      | 10 (3.5)               | TCGA                               |
| Normal colon                                                     | 38   | 69 (12.4)     | 21 (55.3)   | 20 (52.6)   | 4 (10.5)    | 0 (0)       | 14 (36.8)             | 0 (0)            | --            | --             | --              | --             | --                     | TCGA                               |
| Esophageal carcinoma                                             | 185  | 62 (11.9)     | 158 (85.4)  | 114 (61.6)  | 5 (2.7)     | 46 (24.9)   | 20 (10.8)             | 0 (0)            | 18 (11.1)     | 79 (48.8)      | 56 (34.6)       | 9 (5.6)        | 23 (12.4)              | TCGA                               |
| Normal esophagus                                                 | 16   | 68 (11.0)     | 10 (62.5)   | 16 (100.0)  | 0 (0)       | 0 (0)       | 0 (0)                 | 0 (0)            | --            | --             | --              | --             | --                     | TCGA                               |
| Head and neck squamous cell carcinoma                            | 528  | 61 (11.9)     | 386 (73.1)  | 452 (85.6)  | 48 (9.1)    | 11 (2.1)    | 15 (2.8)              | 2 (0.4)          | 27 (6.0)      | 74 (16.3)      | 82 (18.1)       | 270 (59.6)     | 75 (14.2)              | TCGA                               |
| Normal head and neck tissue                                      | 50   | 62 (10.6)     | 38 (76.0)   | 43 (86.0)   | 6 (12.0)    | 0 (0)       | 1 (2.0)               | 0 (0)            | --            | --             | --              | --             | --                     | TCGA                               |
| Kidney chromophobe carcinoma                                     | 66   | 52 (14.3)     | 39 (59.1)   | 58 (87.9)   | 4 (6.1)     | 2 (3.0)     | 2 (3.0)               | 0 (0)            | 21 (31.8)     | 25 (37.9)      | 14 (21.2)       | 6 (9.1)        | 0 (0)                  | TCGA                               |
| Kidney renal clear cell carcinoma                                | 319  | 61 (11.8)     | 205 (64.3)  | 266 (83.4)  | 49 (15.4)   | 1 (0.3)     | 3 (0.9)               | 0 (0)            | 155 (48.9)    | 31 (9.8)       | 73 (23.0)       | 58 (18.3)      | 2 (0.6)                | TCGA                               |
| Kidney renal papillary cell carcinoma                            | 275  | 62 (12.1)     | 202 (73.5)  | 198 (72.0)  | 54 (19.6)   | 6 (2.2)     | 15 (5.5)              | 2 (0.7)          | 168 (66.9)    | 18 (7.2)       | 51 (20.3)       | 14 (5.6)       | 24 (8.7)               | TCGA                               |
| Normal kidney                                                    | 205  | 63 (11.7)     | 137 (66.8)  | 182 (88.8)  | 14 (6.8)    | 1 (0.5)     | 7 (3.4)               | 1 (0.5)          | --            | --             | --              | --             | --                     | TCGA                               |
| Liver hepatocellular carcinoma                                   | 377  | 59 (13.5)     | 255 (67.6)  | 187 (49.6)  | 17 (4.5)    | 161 (42.7)  | 10 (2.7)              | 2 (0.5)          | 175 (49.6)    | 87 (24.6)      | 86 (24.4)       | 5 (1.4)        | 24 (6.4)               | TCGA                               |
| Normal liver                                                     | 50   | 62 (16.0)     | 30 (60.0)   | 34 (68.0)   | 7 (14.0)    | 6 (12.0)    | 3 (6.0)               | 0 (0)            | --            | --             | --              | --             | --                     | TCGA                               |
| Lung adenocarcinoma                                              | 458  | 65 (10.2)     | 214 (46.7)  | 353 (77.1)  | 50 (10.9)   | 6 (1.3)     | 49 (10.7)             | 0 (0)            | 248 (54.7)    | 112 (24.7)     | 73 (16.1)       | 20 (4.4)       | 5 (1.1)                | TCGA                               |
| Lung squamous cell carcinoma                                     | 370  | 68 (8.7)      | 274 (74.1)  | 274 (74.1)  | 24 (6.5)    | 7 (1.9)     | 65 (17.6)             | 0 (0)            | 172 (46.9)    | 135 (36.8)     | 56 (15.3)       | 4 (1.1)        | 3 (0.8)                | TCGA                               |
| Normal lung                                                      | 74   | 67 (10.8)     | 46 (62.2)   | 60 (81.1)   | 6 (8.1)     | 1 (1.4)     | 7 (9.5)               | 0 (0)            | --            | --             | --              | --             | --                     | TCGA                               |
| Ovarian serous cystadenocarcinoma                                | 10   | 62 (9.1)      | 0 (0)       | 0 (0)       | 10 (100.0)  | 0 (0)       | 0 (0)                 | 0 (0)            | NA            | NA             | NA              | NA             | NA                     | TCGA                               |
| Normal ovarian tissue                                            | 18   | 43 (10.6)     | 0 (0)       | 13 (72.2)   | 5 (27.8)    | 0 (0)       | 0 (0)                 | 0 (0)            | --            | --             | --              | --             | --                     | GSE146552                          |
| Pancreatic adenocarcinoma                                        | 29   | 60 (15.4)     | NA          | NA          | NA          | NA          | NA                    | NA               | NA            | NA             | NA              | NA             | NA                     | GSE53051                           |
| Normal pancreas                                                  | 12   | 54 (12.2)     | NA          | NA          | NA          | NA          | NA                    | NA               | NA            | NA             | NA              | NA             | NA                     | GSE53051                           |
| Prostate adenocarcinoma                                          | 498  | 61 (6.8)      | 498 (100.0) | 413 (82.9)  | 58 (11.6)   | 12 (2.4)    | 14 (2.8)              | 1 (0.2)          | NA            | NA             | NA              | NA             | NA                     | TCGA                               |
| Normal prostate                                                  | 50   | 62 (6.5)      | 50 (100.0)  | 47 (94.0)   | 0 (0)       | 0 (0)       | 3 (6.0)               | 0 (0)            | --            | --             | --              | --             | --                     | TCGA                               |
| Rectum adenocarcinoma                                            | 98   | 63 (12.3)     | 53 (54.1)   | 76 (77.6)   | 5 (5.1)     | 1 (1.0)     | 16 (16.3)             | 0 (0)            | 11 (12.5)     | 29 (33.0)      | 35 (39.8)       | 13 (14.8)      | 10 (10.2)              | TCGA                               |
| Normal rectum                                                    | 12   | 68 (9.9)      | 5 (41.7)    | 1 (8.3)     | 0 (0)       | 0 (0)       | 7 (58.3)              | 4 (33.3)         | --            | --             | --              | --             | --                     | TCGA, E-MTAB-3027                  |
| Stomach adenocarcinoma                                           | 12   | 59 (20.9)     | 7 (58.3)    | 0 (0)       | 0 (0)       | 12 (100)    | 0 (0)                 | 0 (0)            | NA            | NA             | NA              | NA             | NA                     | GSE164988                          |
| Normal stomach                                                   | 12   | 65 (6.6)      | 7 (58.3)    | 0 (0)       | 0 (0)       | 12 (100)    | 0 (0)                 | 0 (0)            | --            | --             | --              | --             | --                     | GSE164988                          |
| Thyroid carcinoma                                                | 507  | 47 (15.8)     | 136 (26.8)  | 334 (65.9)  | 27 (5.3)    | 52 (10.3)   | 93 (18.3)             | 1 (0.2)          | 285 (56.4)    | 52 (10.3)      | 113 (22.4)      | 55 (10.9)      | 2 (0.4)                | TCGA                               |
| Normal Thyroid                                                   | 56   | 46 (17.1)     | 14 (25.0)   | 38 (67.9)   | 6 (10.7)    | 3 (5.4)     | 9 (16.1)              | 9 (16.1)         | --            | --             | --              | --             | --                     | TCGA                               |
| Uterine corpus endometrial carcinoma                             | 431  | 64 (11.2)     | 0 (0)       | 287 (66.6)  | 98 (22.7)   | 8 (1.9)     | 9 (2.1)               | 29 (6.7)         | NA            | NA             | NA              | NA             | NA                     | TCGA                               |
| Normal endometrial tissue                                        | 46   | 61 (11.3)     | 0 (0)       | 25 (54.3)   | 6 (13.0)    | 1 (2.2)     | 13 (28.3)             | 0 (0)            | --            | --             | --              | --             | --                     | TCGA                               |
| Normal lung and colon epithelial cell                            | 6    | 67 (12.4)     | 5 (83.3)    | 6 (100)     | 0 (0)       | 0 (0)       | 0 (0)                 | 0 (0)            | --            | --             | --              | --             | --                     | GSE122126                          |
| Normal vascular and lymphatic endothelial cell                   | 6    | 28 (29.0)     | 4 (66.7)    | 4 (66.7)    | 0 (0)       | 2 (33.3)    | 0 (0)                 | 0 (0)            | --            | --             | --              | --             | --                     | GSE122126, E-MTAB-8952             |
| Normal cord tissue stromal cell                                  | 14   | 0 (0)         | 10 (71.4)   | 5 (35.7)    | 4 (28.6)    | 5 (35.7)    | 0 (0)                 | 0 (0)            | --            | --             | --              | --             | --                     | FlowSorted.CordTissueAndBlood.EPIC |
| Basophil                                                         | 6    | 46 (14.0)     | 5 (83.3)    | 5 (83.3)    | 1 (16.7)    | 0 (0)       | 0 (0)                 | 0 (0)            | --            | --             | --              | --             | --                     | GSE167998                          |
| Eosinophil                                                       | 4    | 25 (4.5)      | 3 (75.0)    | 0 (0)       | 1 (25.0)    | 3 (75.0)    | 0 (0)                 | 0 (0)            | --            | --             | --              | --             | --                     | GSE167998                          |
| Neutrophil                                                       | 6    | 27 (7.3)      | 5 (83.3)    | 3 (50.0)    | 1 (16.7)    | 0 (0)       | 0 (0)                 | 2 (33.3)         | --            | --             | --              | --             | --                     | GSE167998                          |
| Monocyte                                                         | 5    | 33 (9.8)      | 4 (80.0)    | 2 (40.0)    | 1 (20.0)    | 1 (20.0)    | 0 (0)                 | 0 (0)            | --            | --             | --              | --             | --                     | GSE167998                          |
| NK                                                               | 4    | 34 (13.5)     | 4 (100.0)   | 3 (75.0)    | 1 (25.0)    | 0 (0)       | 0 (0)                 | 0 (0)            | --            | --             | --              | --             | --                     | GSE167998                          |
| B naive                                                          | 4    | 35 (5.3)      | 2 (50.0)    | 2 (50.0)    | 1 (25.0)    | 0 (0)       | 0 (0)                 | 1 (25.0)         | --            | --             | --              | --             | --                     | GSE167998                          |
| B memory                                                         | 6    | 32 (12.0)     | 3 (50.0)    | 5 (83.3)    | 1 (16.7)    | 0 (0)       | 0 (0)                 | 0 (0)            | --            | --             | --              | --             | --                     | GSE167998                          |
| CD4T naive                                                       | 5    | 24 (2.3)      | 5 (100.0)   | 5 (100.0)   | 0 (0)       | 0 (0)       | 0 (0)                 | 0 (0)            | --            | --             | --              | --             | --                     | GSE167998                          |
| CD4T memory                                                      | 4    | 41 (14.5)     | 3 (75.0)    | 4 (100.0)   | 0 (0)       | 0 (0)       | 0 (0)                 | 0 (0)            | --            | --             | --              | --             | --                     | GSE167998                          |
| T regulatory                                                     | 3    | 34 (15.5)     | 1 (33.3)    | 2 (66.7)    | 1 (33.3)    | 0 (0)       | 0 (0)                 | 0 (0)            | --            | --             | --              | --             | --                     | GSE167998                          |
| CD8T naive                                                       | 5    | 29 (9.9)      | 4 (80.0)    | 5 (100.0)   | 0 (0)       | 0 (0)       | 0 (0)                 | 0 (0)            | --            | --             | --              | --             | --                     | GSE167998                          |
| CD8T memory                                                      | 4    | 24 (2.3)      | 5 (100.0)   | 5 (100.0)   | 0 (0)       | 0 (0)       | 0 (0)                 | 0 (0)            | --            | --             | --              | --             | --                     | GSE167998                          |
| Dendritic cell                                                   | 5    | 55 (12.8)     | 2 (40)      | 4 (80.0)    | 0 (0)       | 1 (20.0)    | 0 (0)                 | 0 (0)            | --            | --             | --              | --             | --                     | GSE193297                          |
| Total                                                            | 6859 |               |             |             |             |             |                       |                  |               |                |                 |                |                        |                                    |

\*Horvath methylation age inferred using watermelon  
# Inferred sex and ethnicity, based on methylation using ScSAMe

Supplementary Table 1

| Data Source | Tissue Type                                                  | N   | Mean Age (SD) | Male N (%) | White N (%) | Black N (%) | Asian N (%) | Unreported Race N (%) | Other Race N (%) |
|-------------|--------------------------------------------------------------|-----|---------------|------------|-------------|-------------|-------------|-----------------------|------------------|
| GSE133556   | High grade serous ovarian cancer                             | 99  | 43 (16.5)*    | 0 (0)      | 97 (98.0)#  | 1 (1.0)#    | 1 (1.0)#    | 0 (0)#                | 0 (0)#           |
| GSE182379   | Immune cell artificial mixtures                              | 12  | --            | --         | --          | --          | --          | --                    | --               |
| TCGA        | Pancreatic adenocarcinoma                                    | 184 | 65 (11.0)     | 102 (55.4) | 162 (88.0)  | 7 (3.8)     | 11 (6.0)    | 4 (2.2)               | 0 (0)            |
| TCGA        | Stomach adenocarcinoma                                       | 395 | 65 (10.7)     | 259 (65.6) | 253 (64.1)  | 13 (3.3)    | 89 (22.5)   | 39 (9.9)              | 1 (0.3)          |
| E-MTAB-5463 | Normal human intestinal epithelium                           | 6   | 10 (5.7)      | 1 (10.0)   | 6 (100)#    | 0 (0)#      | 0 (0)#      | 0 (0)#                | 0 (0)#           |
| GSE82234    | Human umbilical vein endothelial cells                       | 6   | 0 (0)         | 6 (100)    | 4 (66.7)#   | 2 (33.3)#   | 0 (0)#      | 0 (0)#                | 0 (0)#           |
| GSE148766   | Drug sensitive and resistant metastatic colorectal carcinoma | 36  | 50 (13.5)*    | NA         | NA          | NA          | NA          | NA                    | NA               |
| GSE100503   | Breast in ductal carcinoma in situ core biopsy               | 13  | 56 (11.3)     | 13 (100)   | 13 (100)#   | 0 (0)#      | 0 (0)#      | 0 (0)#                | 0 (0)#           |
| GSE66313    | Breast in ductal carcinoma in situ surgical excision         | 13  | 56 (11.3)     | 13 (100)   | 13 (100)#   | 0 (0)#      | 0 (0)#      | 0 (0)#                | 0 (0)#           |
| GSE141441   | Triple-negative breast cancer recurrence                     | 166 | 59 (15.4)     | 0 (0)      | NA          | NA          | NA          | NA                    | NA               |

\*Horvath methylation age inferred using *wateRmelon*

# Inferred sex and ethnicity, based on methylation using *SeSAMe*

| Tumor Type                            | Cell Type      | Hazard ratio (95%CI) |
|---------------------------------------|----------------|----------------------|
| Head and neck squamous cell carcinoma | Stromal        | 1.51 (1.02, 2.22)    |
|                                       | Endothelial    | 1.57 (1.07, 2.29)    |
| Bladder carcinoma                     | Dendritic cell | 0.45 (0.28, 0.73)    |
| Kidney papillary carcinoma            | Endothelial    | 3.48 (1.27, 9.55)    |
|                                       | Stromal        | 3.44 (1.46, 8.13)    |
| Lung adenocarcinoma                   | CD8mem         | 0.50 (0.32, 0.79)    |
|                                       | Endothelial    | 1.83 (1.13, 2.95)    |
|                                       | Epithelial     | 0.50 (0.31, 0.80)    |
| Lung squamous cell carcinoma          | Epithelial     | 1.80 (1.16, 2.78)    |
| Thyroid carcinoma                     | Bmem           | 7.13 (1.17, 43.53)   |

Supplementary Table 3
