# Supplementary material for: HiTIMED: hierarchical tumor immune microenvironment epigenetic deconvolution for accurate cell type resolution in the tumor microenvironment using tumor-type-specific DNA methylation data
Source: Springer Nature journal article supplement (doi:10.1186/s12967-022-03736-6), 2022-11-08
Supplement: MOESM2 [file 23689358]

# Supplementary Figures

**HiTIMED: Hierarchical Tumor Immune Microenvironment Epigenetic Deconvolution** for accurate cell type resolution in the tumor microenvironment using tumor-type-specific DNA methylation data

## Table of Contents

|                                                                                                                                                                                                                                               |    |
|-----------------------------------------------------------------------------------------------------------------------------------------------------------------------------------------------------------------------------------------------|----|
| <b>Supplementary Figure 1.</b> Correlation between <i>HiTIMED</i> tumor and <i>InfiniumPurify</i> tumor by tumor type across cholangiocarcinoma, kidney papillary cell carcinoma, pancreatic adenocarcinoma, and stomach adenocarcinoma ..... | 3  |
| <b>Supplementary Figure 2.</b> Methylation state of CpGs in the <i>HiTIMED</i> tumor specific library (L1) and <i>InfiniumPurify</i> default library .....                                                                                    | 4  |
| <b>Supplementary Figure 3.</b> <i>HiTIMED</i> tumor purity vs <i>InfiniumPurify</i> tumor purity in thyroid carcinoma.....                                                                                                                    | 5  |
| <b>Supplementary Figure 4.</b> <i>HiTIMED</i> tumor proportion vs other method predicted tumor proportion.....                                                                                                                                | 6  |
| <b>Supplementary Figure 5.</b> <i>HiTIMED</i> immune cell proportions vs true immune cell proportions in artificial mixtures .....                                                                                                            | 7  |
| <b>Supplementary Figure 6.</b> <i>HiTIMED</i> T cell proportion vs true T cell proportion in artificial mixtures .....                                                                                                                        | 8  |
| <b>Supplementary Figure 7.</b> <i>HiTIMED</i> cell composition in human normal intestinal epithelium and umbilical vein endothelial cells .....                                                                                               | 9  |
| <b>Supplementary Figure 8.</b> Performance comparison across <i>HiTIMED</i> , <i>MethylCIBERSORT</i> , and <i>MethylResolver</i> using artificial mixtures .....                                                                              | 10 |
| <b>Supplementary Figure 9.</b> The distribution of the <i>HiTIMED</i> cell composition in TCGA tumors .....                                                                                                                                   | 11 |
| <b>Supplementary Figure 10.</b> Cell composition differs substantially and captures sample heterogeneity using <i>HiTIMED</i> -projected proportions. Seventeen cell types were captured for each sample by tumor type .....                  | 12 |
| <b>Supplementary Figure 11.</b> Sensitive analysis comparing outputs from two Cox models with or without cell type proportions adjusted in kidney clear cell carcinoma .....                                                                  | 13 |
| <b>Supplementary Figure 12.</b> Kaplan-Meier survival curves for <i>HiTIMED</i> cells estimates in TCGA tumors .....                                                                                                                          | 14 |
| <b>Supplementary Figure 13.</b> <i>HiTIMED</i> cell comparison and Kaplan-Meier survival curves across immune/angiogenic hot and cold .....                                                                                                   | 15 |
| <b>Supplementary Figure 14.</b> <i>HiTIMED</i> immune and angiogenic proportions across C1-C6 subtyped TCGA tumor .....                                                                                                                       | 16 |

**Supplementary Figure 15.** *HiTIMED* cell comparisons between drug-sensitive and -resistant metastasized colorectal cancer ..... 17

**Supplementary Figure 16.** *HiTIMED* cell comparisons in triple-negative breast cancer w/without chemotherapy ..... 18

**Supplementary Figure 17.** Performance comparison across iterations on CpGs selected in *HiTIMED* for immune and angiogenic cell projection. 19

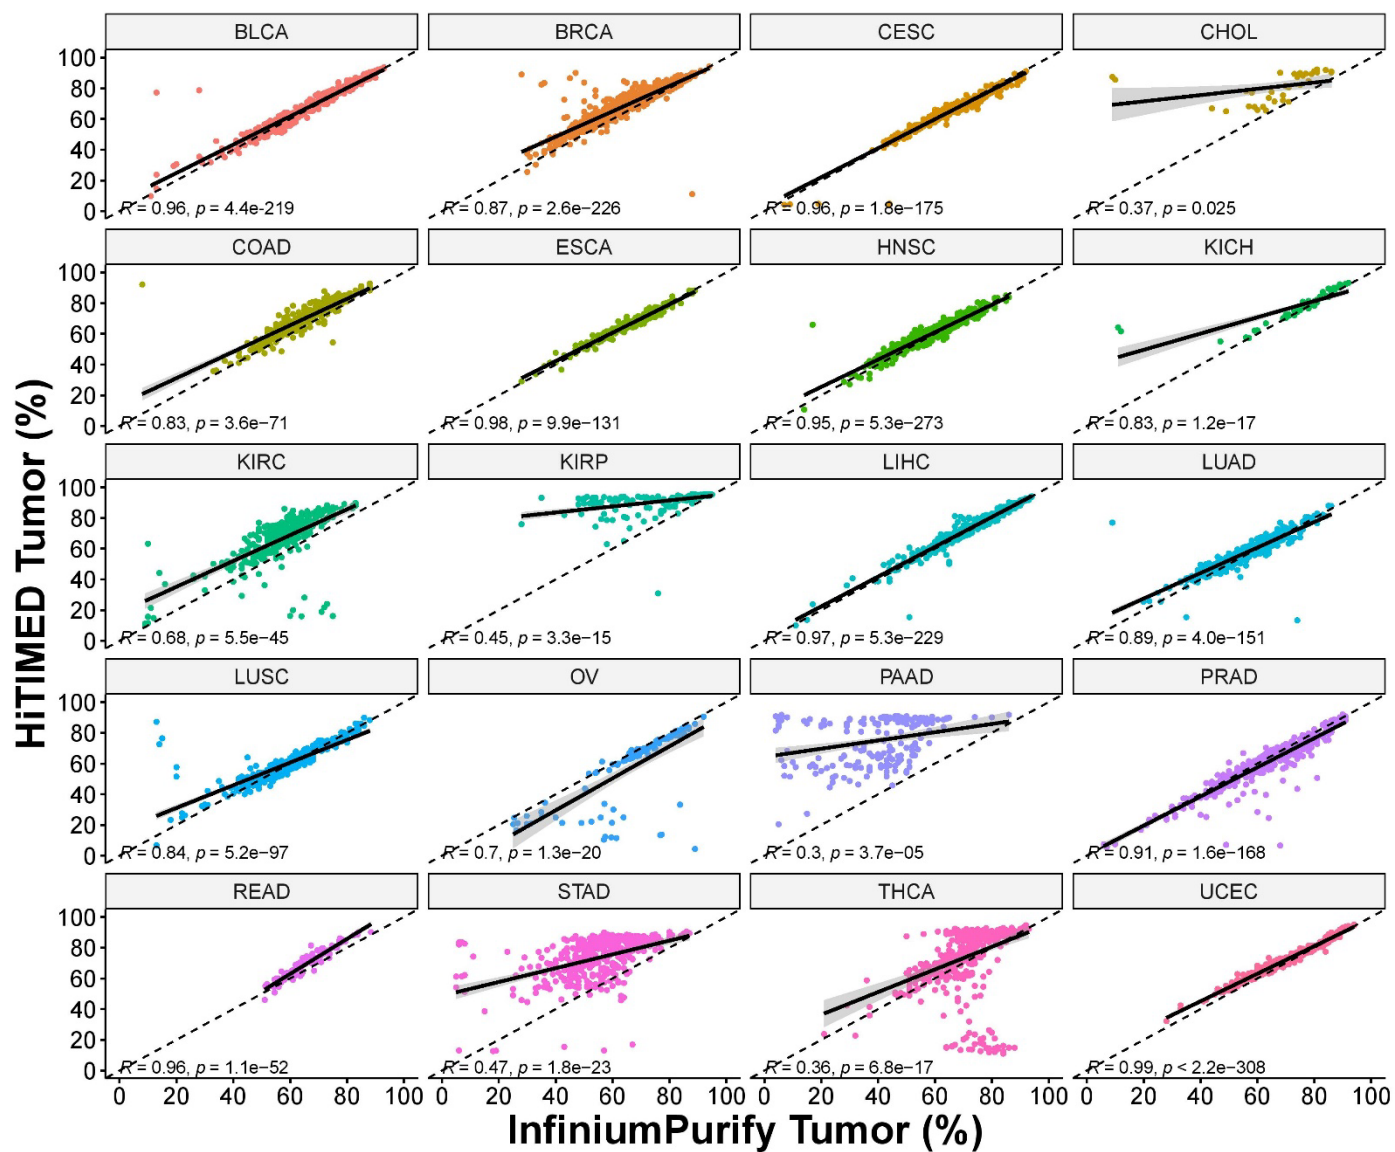

**Supplementary Figure 1.** Correlation between *HiTIMED* tumor and *InfiniumPurify* tumor by tumor type. *HiTIMED* projected tumor proportions are highly significantly correlated with the *InfiniumPurify* predicted tumor purities across tumor types.

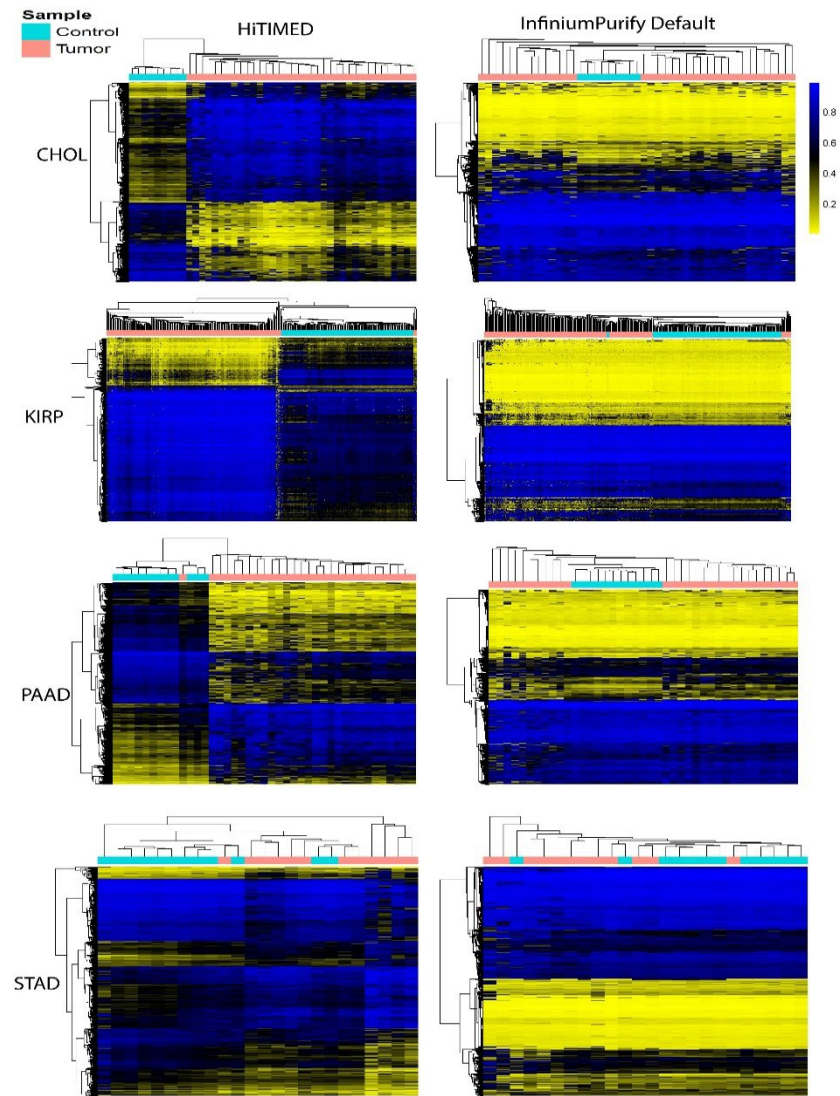

**Supplementary Figure 2.** Methylation state of CpGs in the *HITIMED* tumor specific library (L1) and *InfiniumPurify* default library between tumor and normal samples across cholangiocarcinoma, kidney papillary cell carcinoma, pancreatic adenocarcinoma, and stomach adenocarcinoma.

Panel A

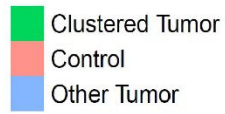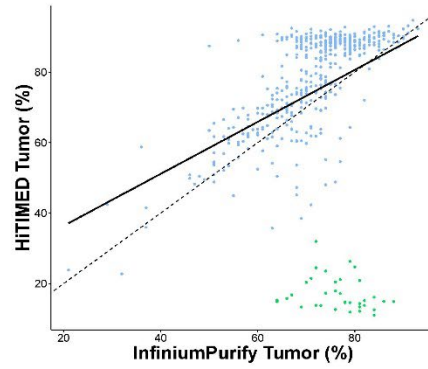

Panel B

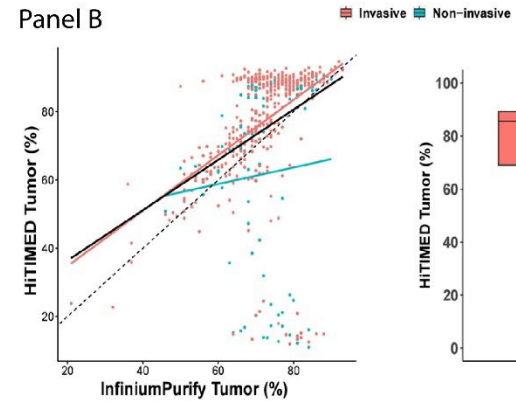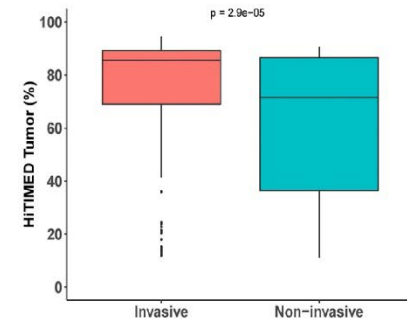

iDMC Default Library

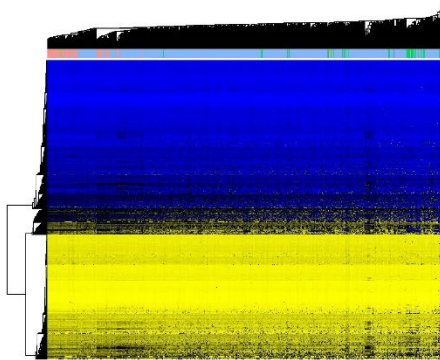

HiTIMED THCA Library

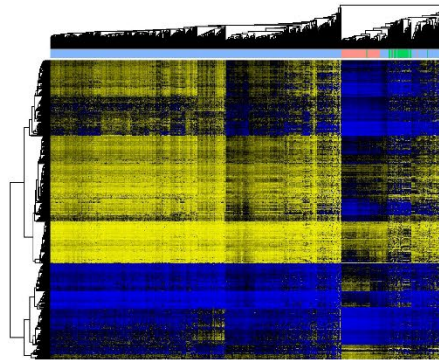

**Supplementary Figure 3.** *HiTIMED* tumor purity vs *InfiniumPurify* tumor purity in thyroid carcinoma. **Panel A.** A cluster of *HiTIMED*-predicted tumor purity low but *InfiniumPurify*-predicted high tumor was identified and colored in heatmaps. **Panel B.** *HiTIMED* tumor proportion in thyroid carcinoma colored by invasive and non-invasive tumor type.

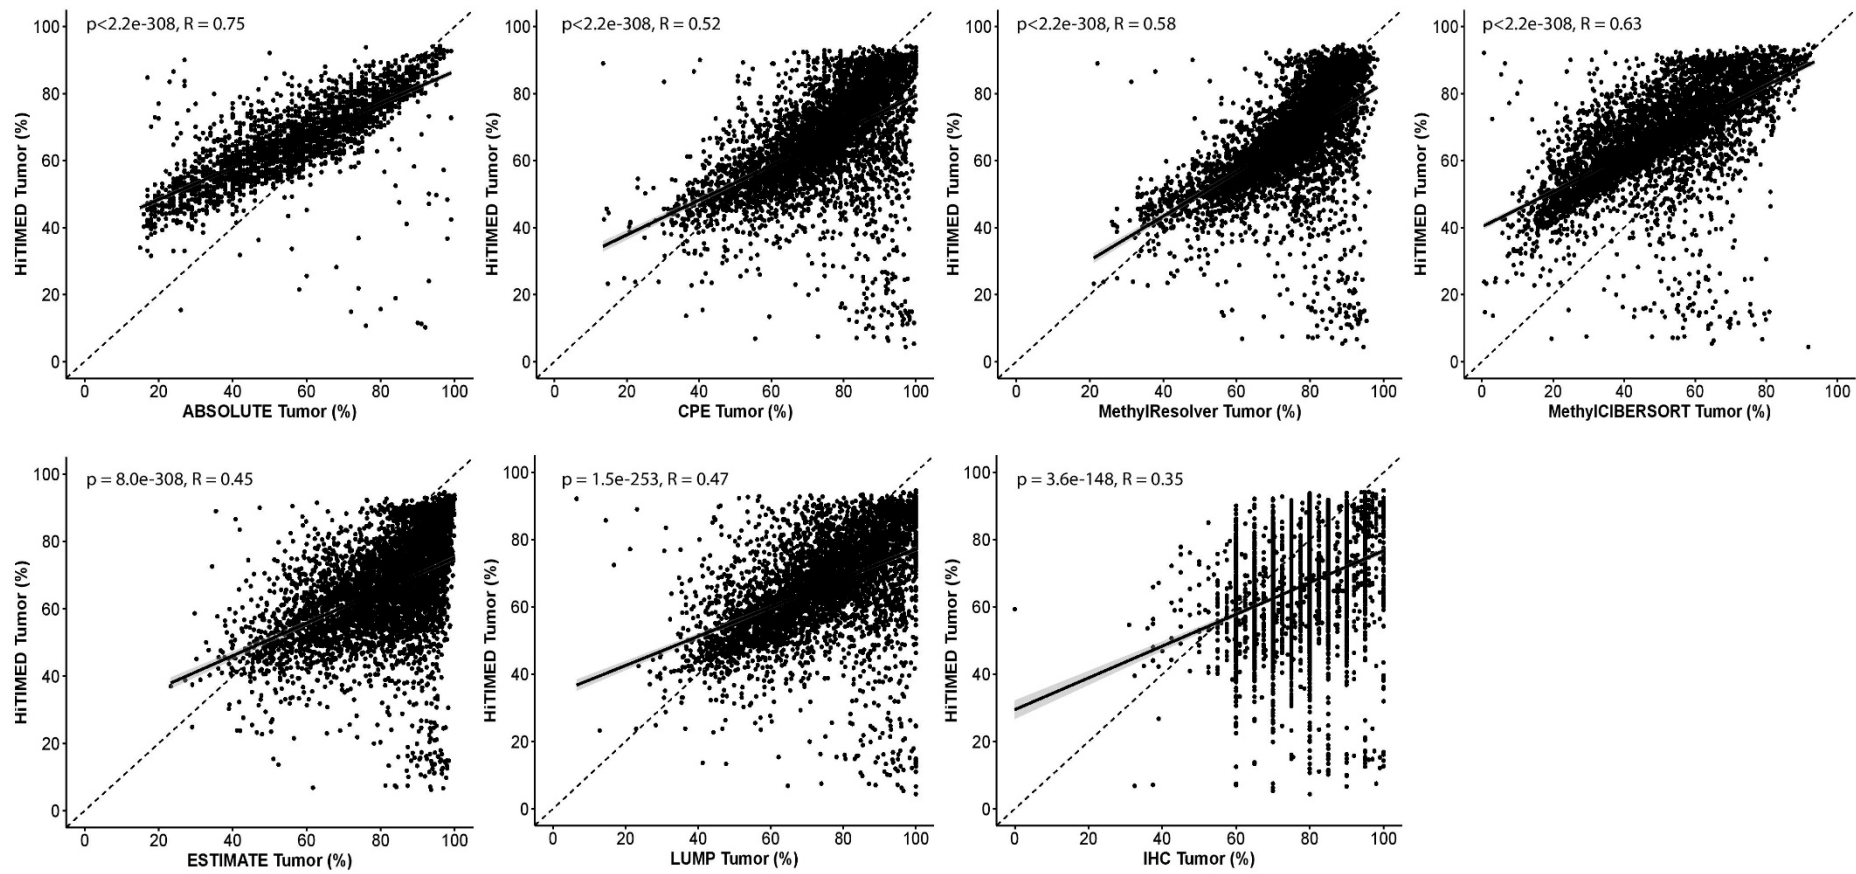

**Supplementary Figure 4.** *HiTIMED* tumor proportion vs other method predicted tumor proportion.

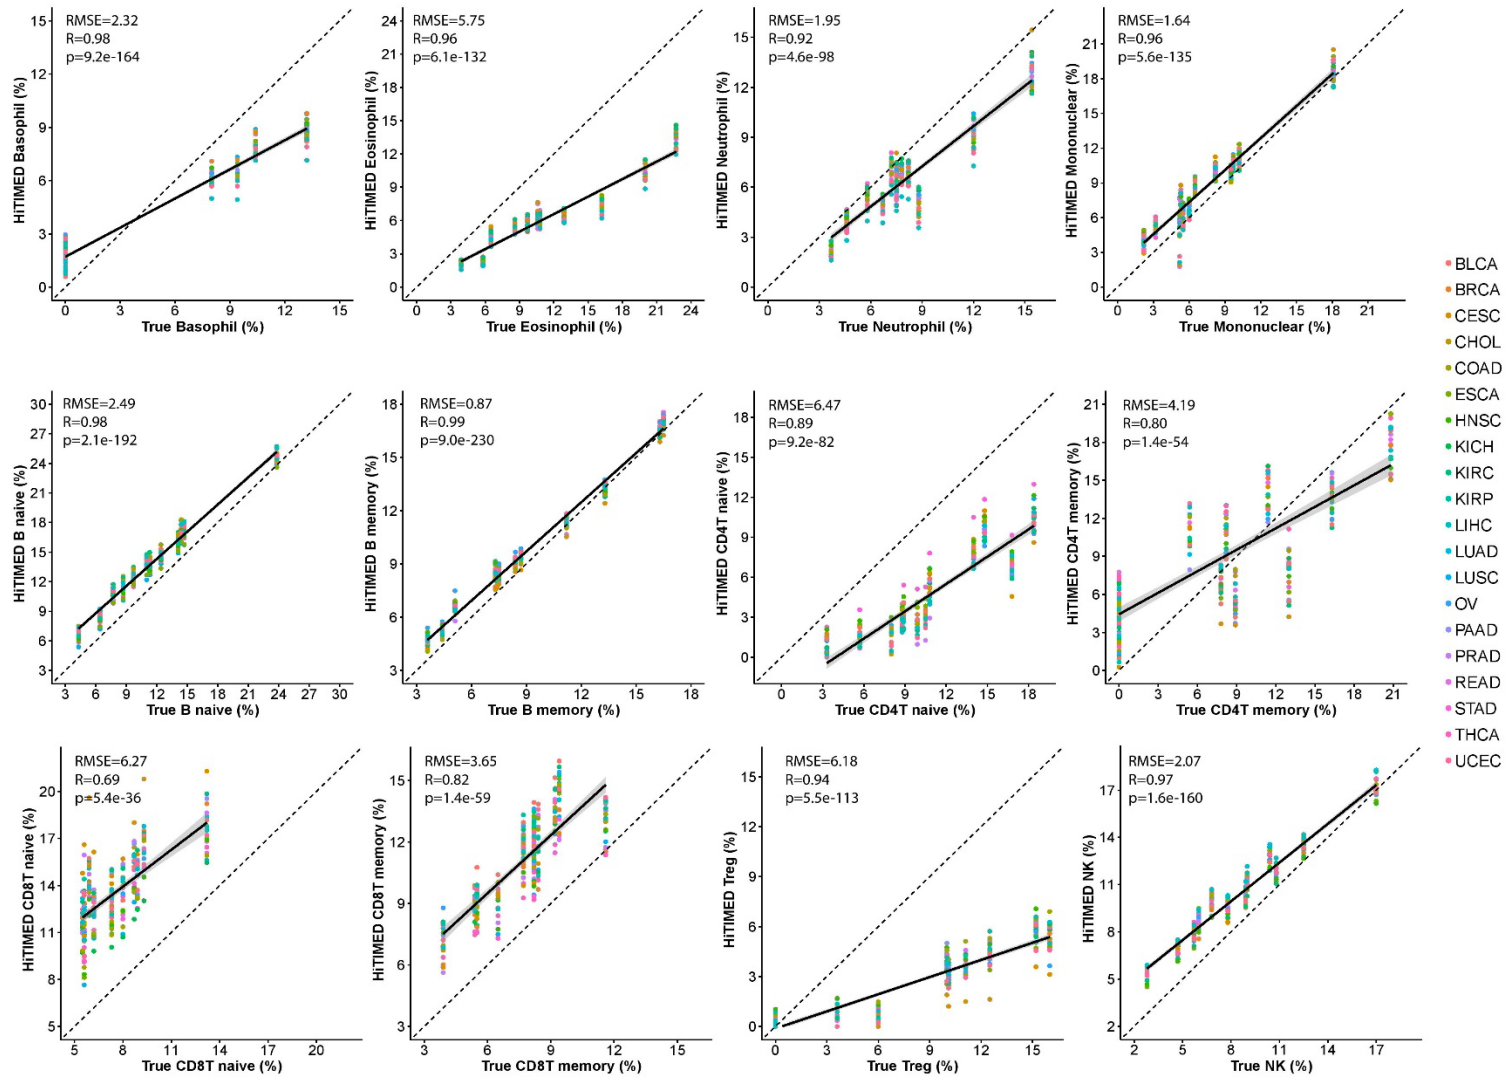

Supplementary Figure 5. *HiTImED* immune cell proportions vs true immune cell proportions in artificial mixtures.

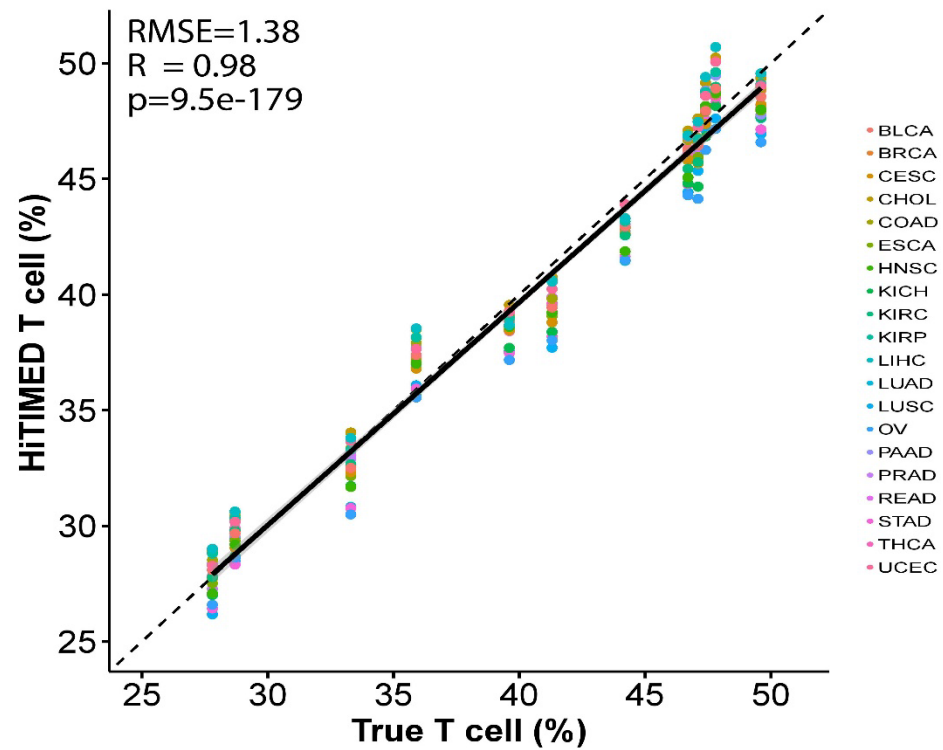

**Supplementary Figure 6.** *HiTIMED* T cell proportion vs true T cell proportion in artificial mixtures.

Note: T cell proportions correspond to the sum of CD4T naive and memory, CD8 naive and memory and T regulatory cells.



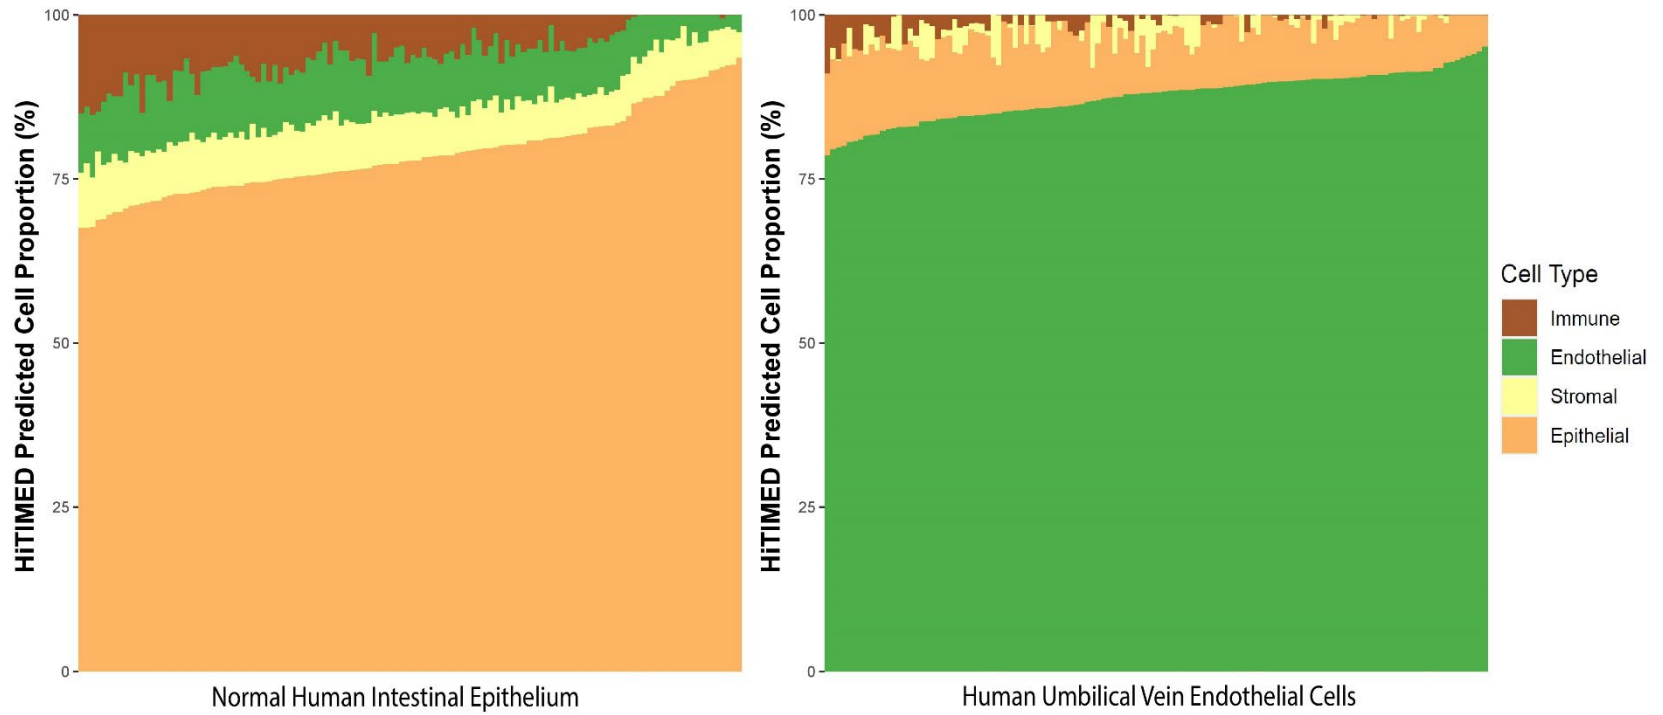

**Supplementary Figure 7.** *HiTIMED* cell composition in human normal intestinal epithelium and umbilical vein endothelial cells.

Panel A

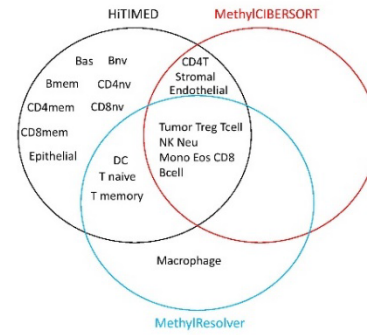

Panel B

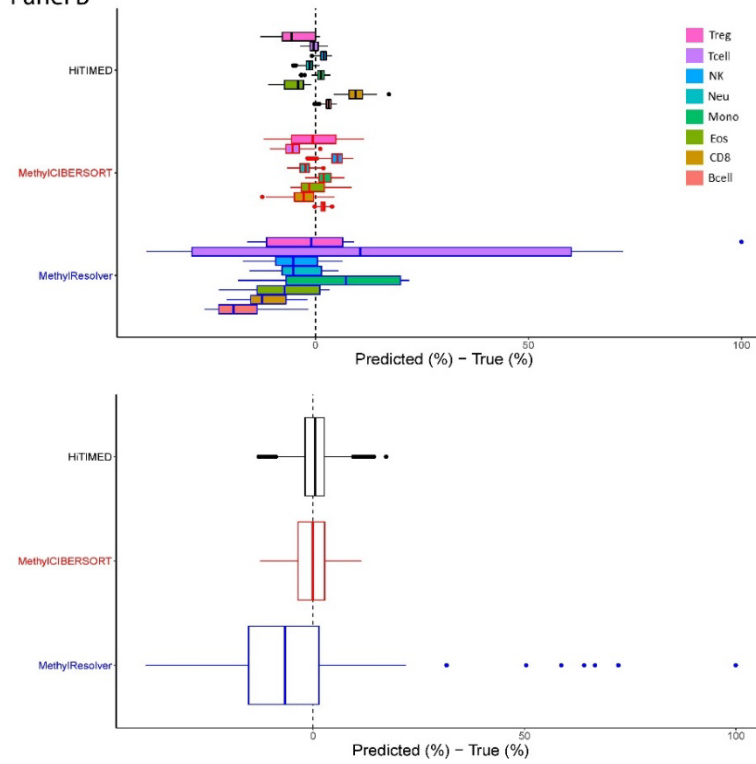

Supplementary Figure 8. Performance comparison across *HiTIMED*, *MethylCIBERSORT*, and *MethylResolver* using artificial mixtures.

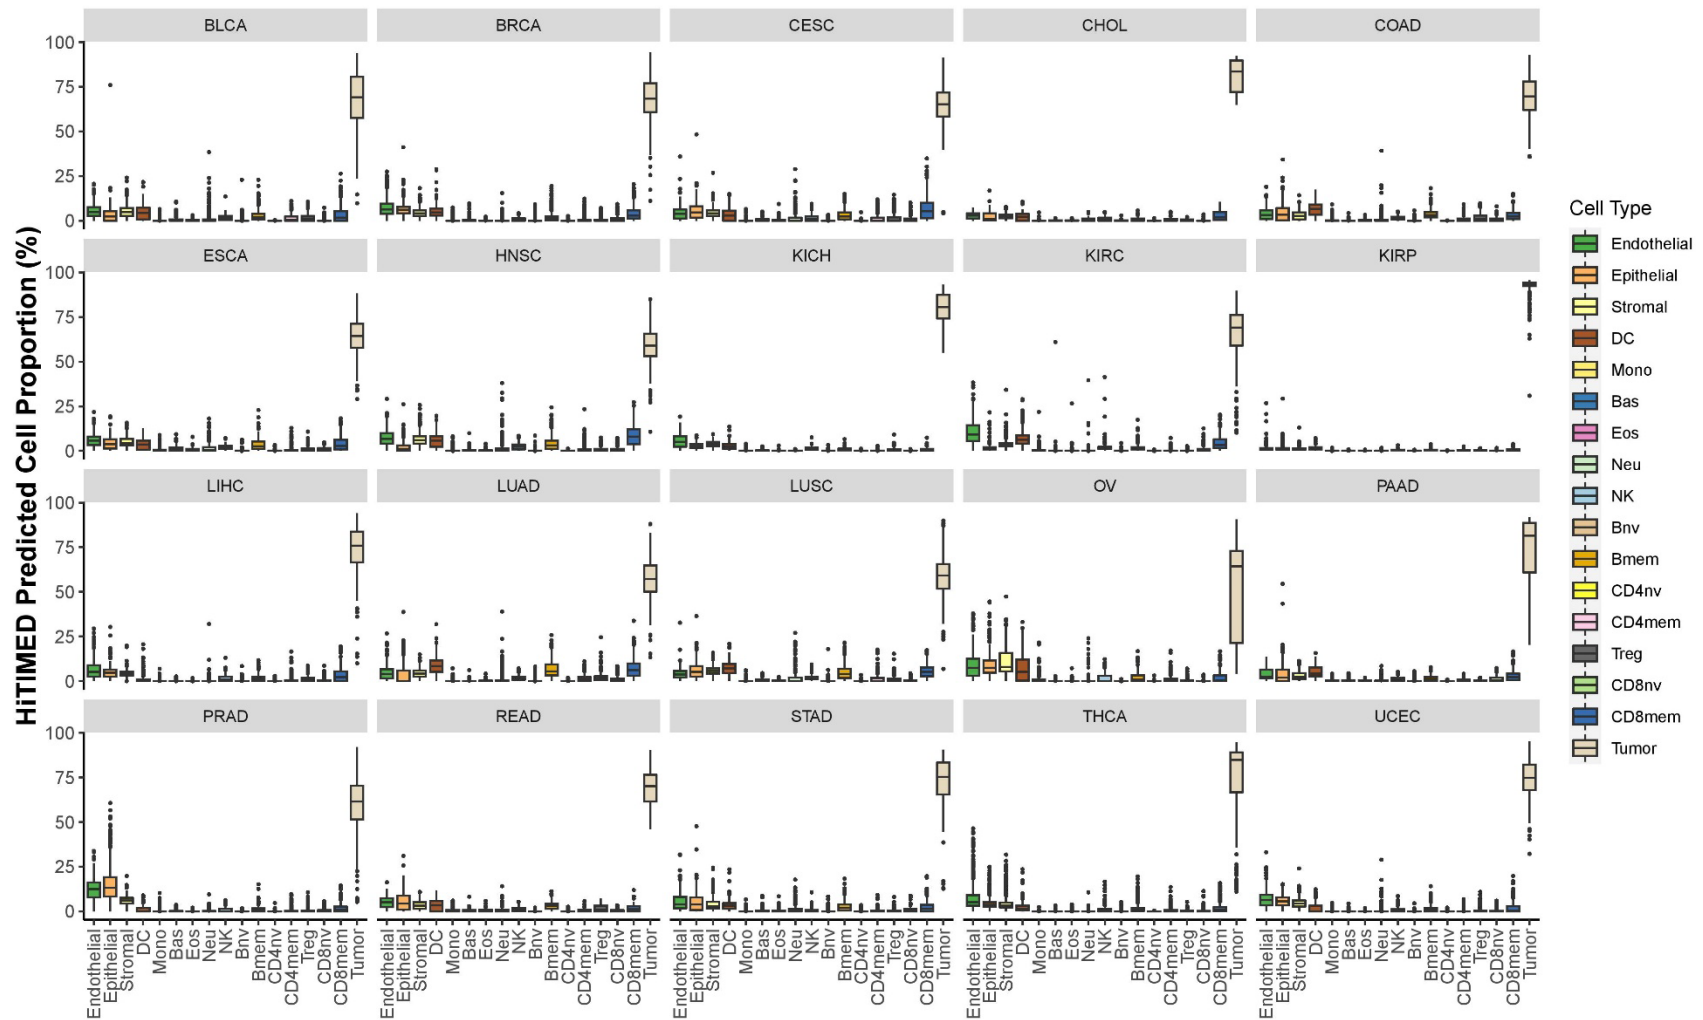

**Supplementary Figure 9.** The distribution of the *HiTIMED* cell composition in TCGA tumors.

Panel A

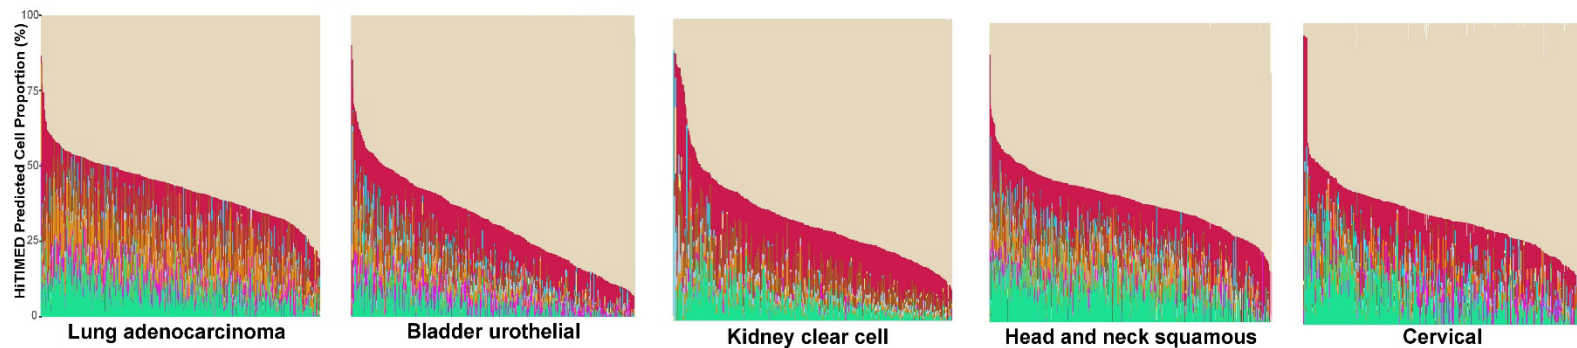

| Tumor type             | HITMED-projected immune variance |
|------------------------|----------------------------------|
| Lung adenocarcinoma    | 156.83                           |
| Bladder urothelial     | 152.33                           |
| Kidney clear cell      | 147.83                           |
| Head and neck squamous | 134.17                           |
| Cervical               | 118.69                           |
| Lung squamous          | 96.94                            |
| Thyroid                | 93.45                            |
| Colon                  | 91.15                            |
| Liver hepatocellular   | 91.07                            |
| Breast invasive        | 90.86                            |

Panel B

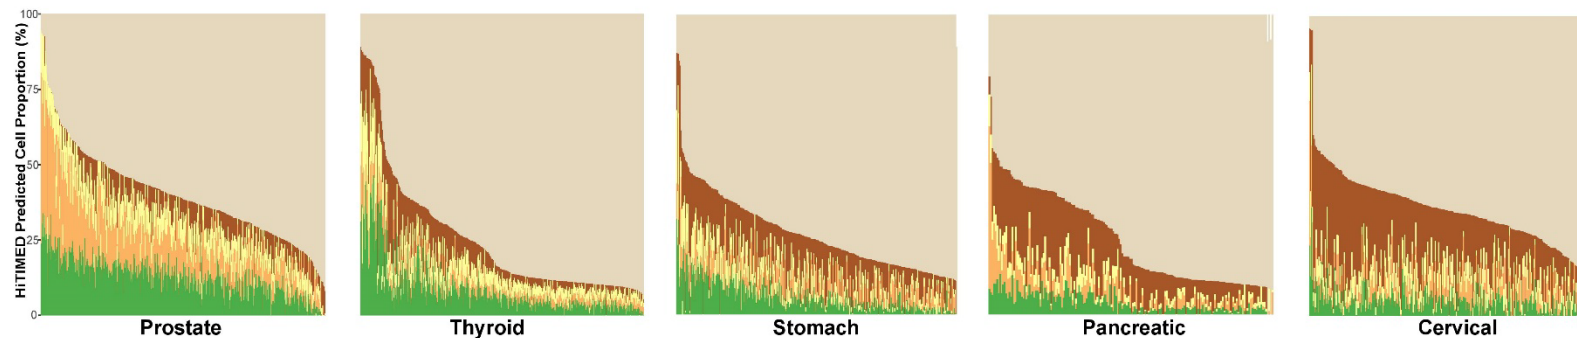

| Tumor type           | HITMED-projected angiogenic variance |
|----------------------|--------------------------------------|
| Prostate             | 284.73                               |
| Thyroid              | 208.77                               |
| Stomach              | 112.98                               |
| Pancreatic           | 105.84                               |
| Cervical             | 89.01                                |
| Lung adenocarcinoma  | 88.33                                |
| Liver hepatocellular | 79.43                                |
| Kidney clear cell    | 79.15                                |
| Breast invasive      | 73.19                                |
| Endometrial          | 66.68                                |

**Supplementary Figure 10.** Cell composition differs substantially and captures sample heterogeneity using *HiTIMED*-projected proportions. Seventeen cell types were captured for each sample by tumor type.

## Kidney clear cell carcinoma

Cox model with age, gender, tumor stage adjusted

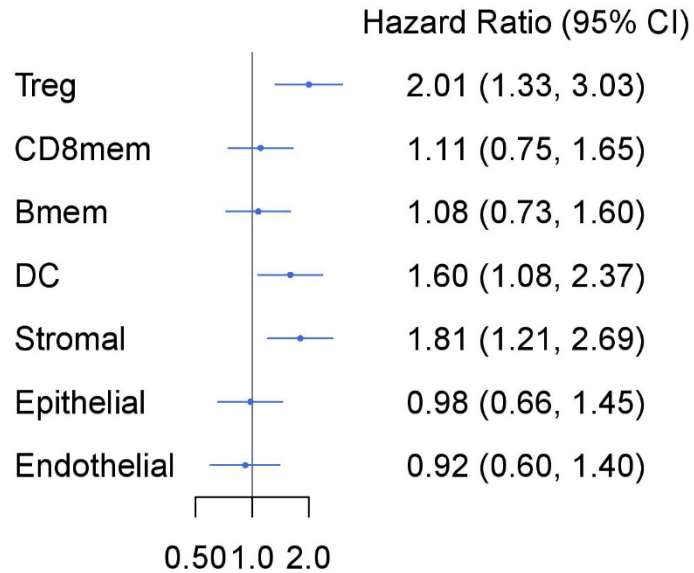

Cox model with age, gender, tumor stage, and HiTIMED-projected cell proportions<sup>1</sup> adjusted

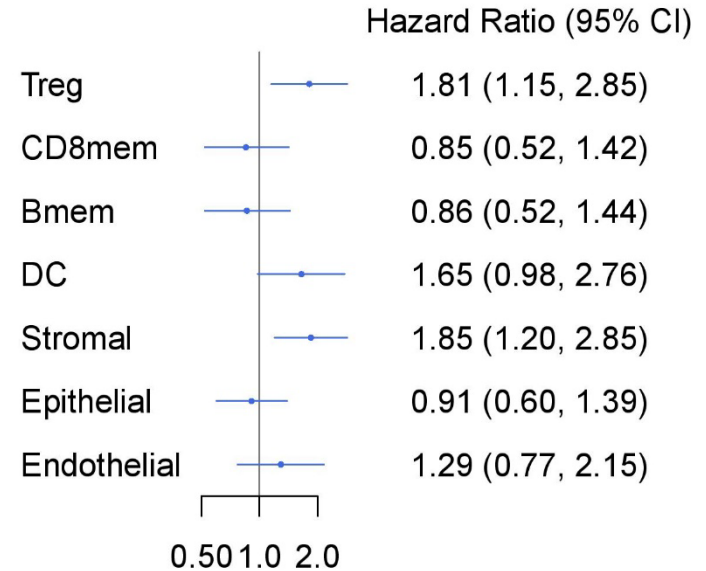

<sup>1</sup>Cell types include tumor, Treg, CD8mem, Bmem, DC, stromal, epithelial, endothelial

**Supplementary Figure 11.** Sensitive analysis comparing outputs from two Cox models with or without cell type proportions adjusted in kidney clear cell carcinoma.

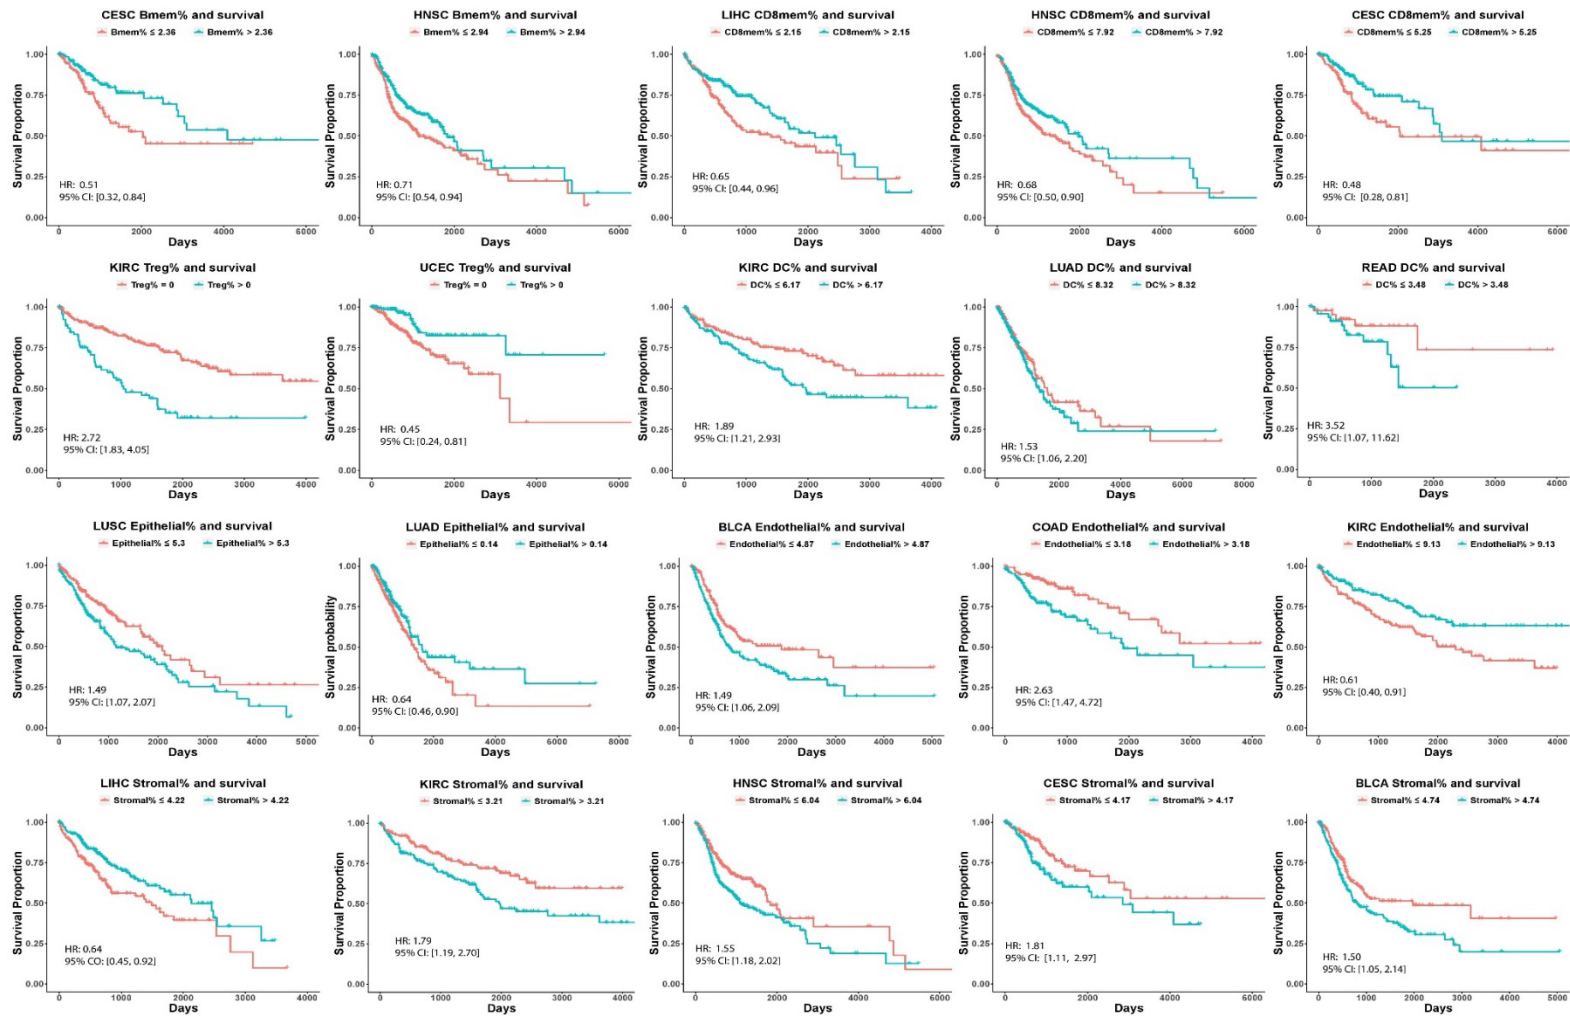

**Supplementary Figure 12.** Kaplan-Meier survival curves for *HITIMED* cells estimates in TCGA tumors. Hazard ratios were calculated from the Cox proportional hazard models with age, gender, and tumor proportion adjusted (gender was not adjusted for gender-specific tumors).

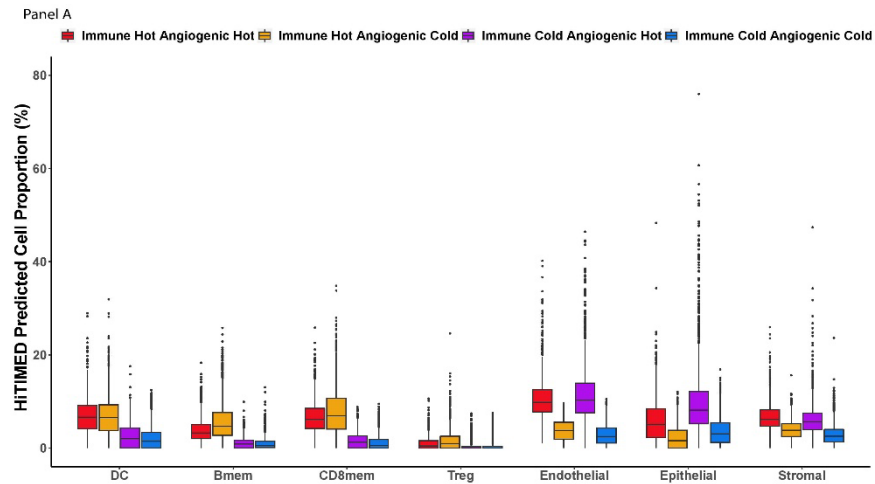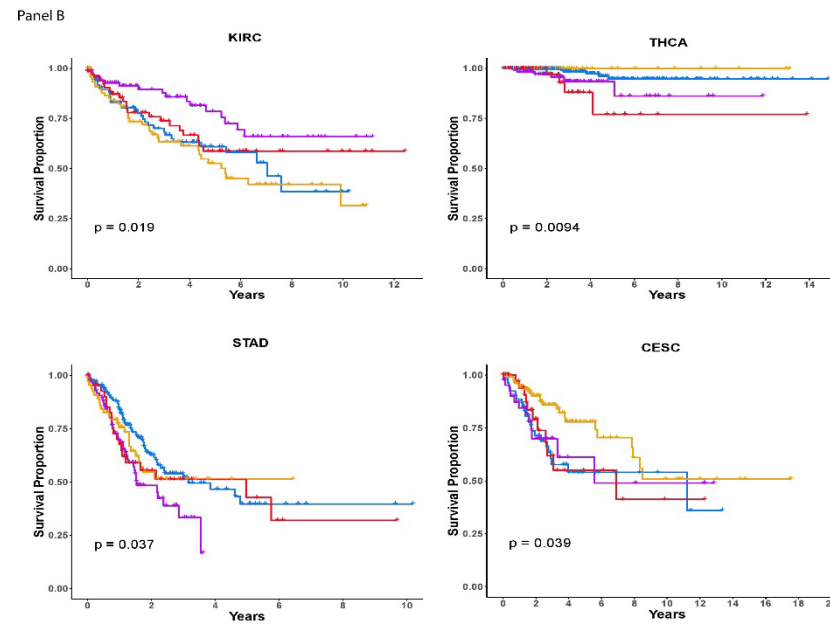

**Supplementary Figure 13. Panel A.** *HITMED* cell comparison and **Panel B.** Kaplan-Meier survival curves across immune/angiogenic hot and cold tumors. P-values were calculated from the log-rank tests.

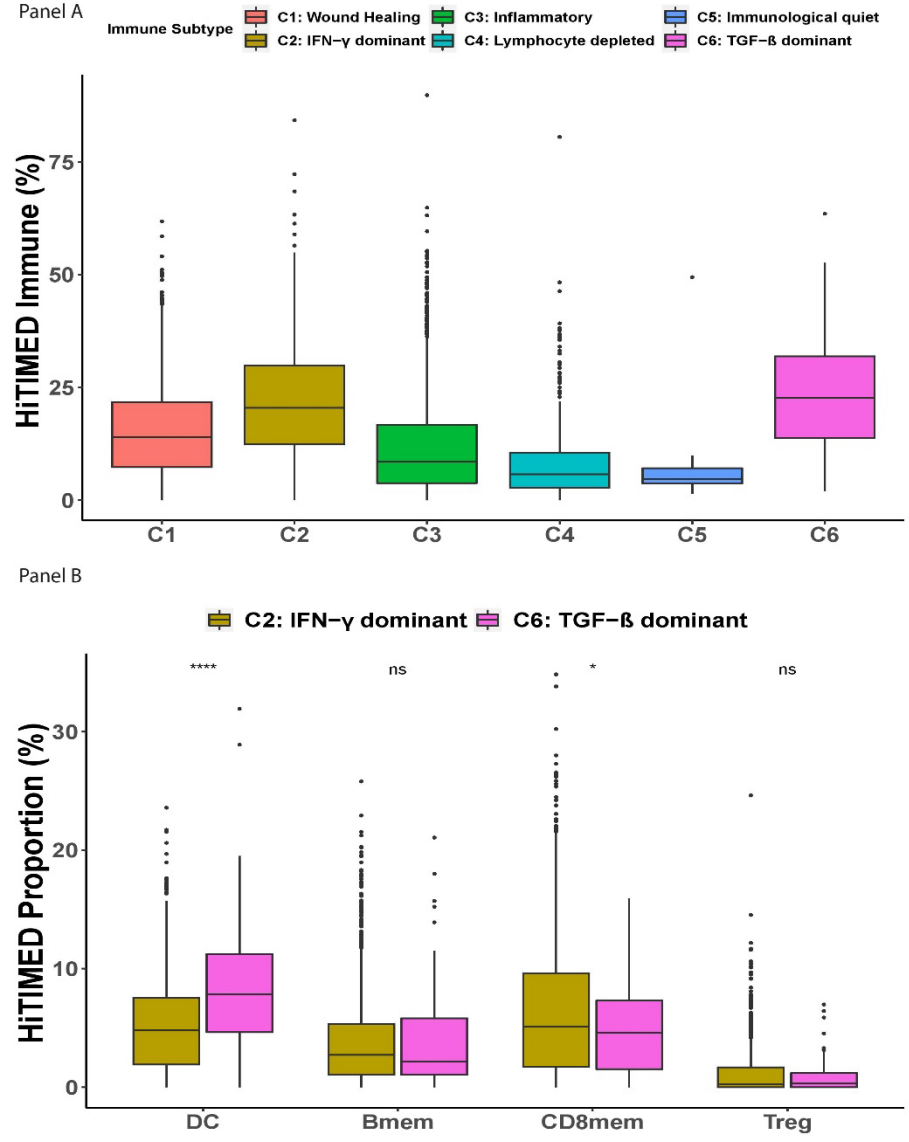

Supplementary Figure 14. *HiTIMED* immune and angiogenic proportions across C1-C6 subtyped TCGA tumor.



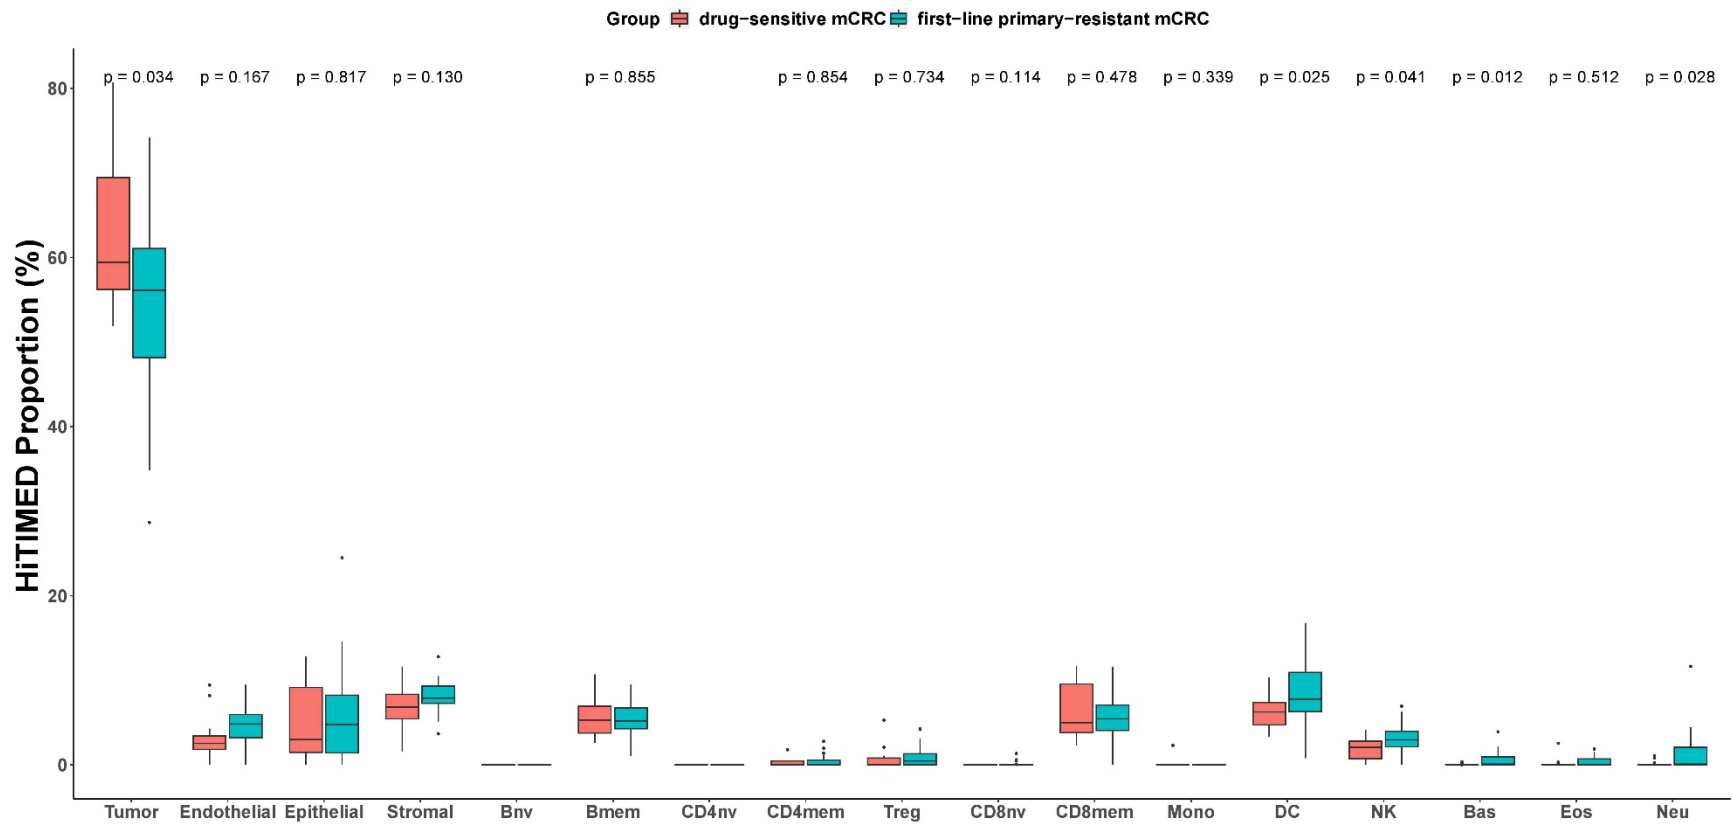

**Supplementary Figure 15.** *HiTIMED* cell comparisons between drug-sensitive and -resistant metastasized colorectal cancer.

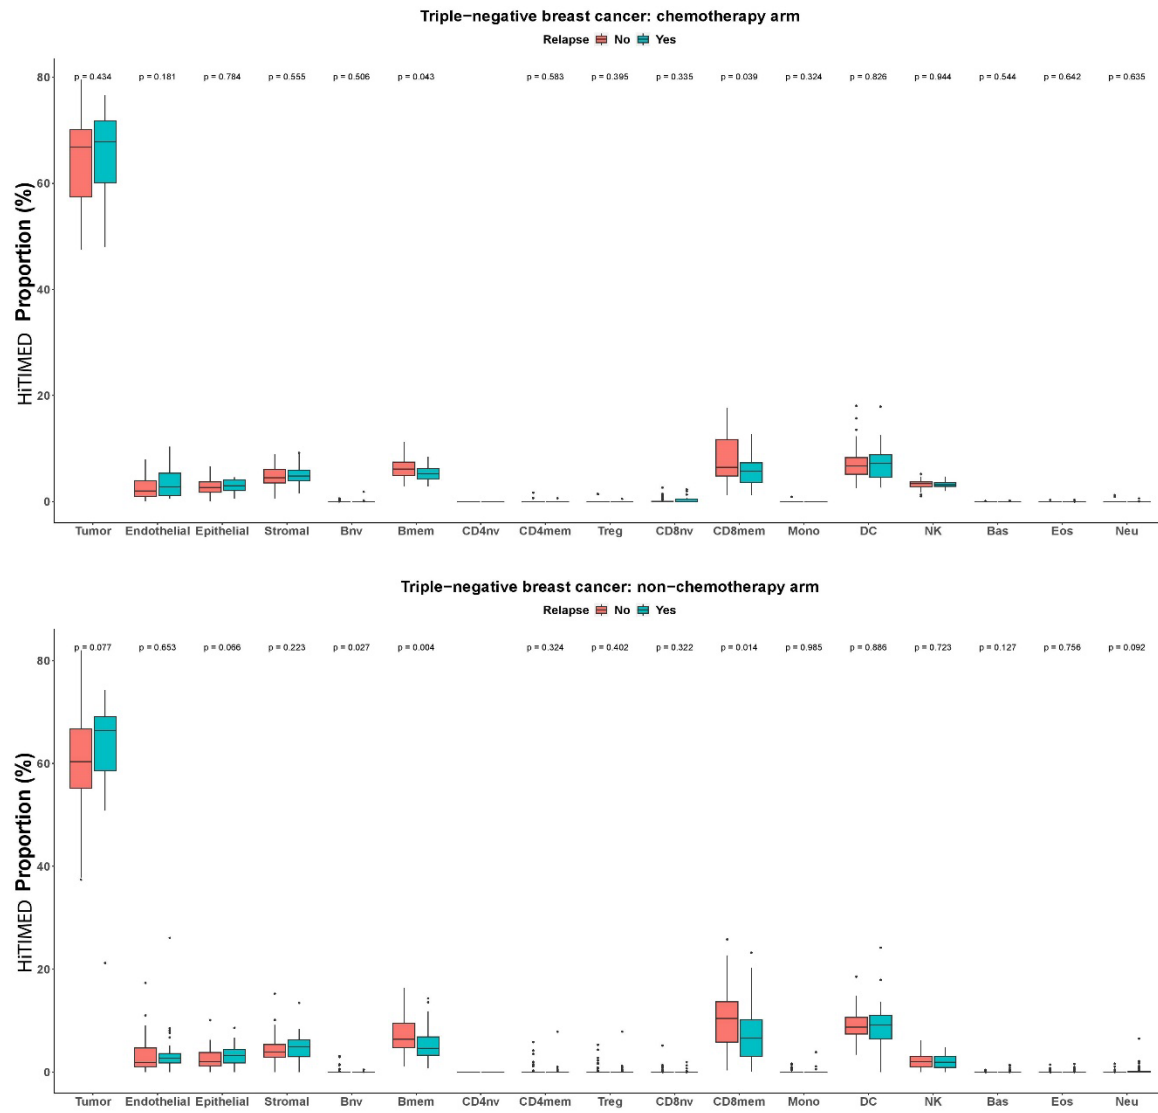

Supplementary Figure 16. *HITMED* cell comparisons in triple-negative breast cancer w/without chemotherapy.

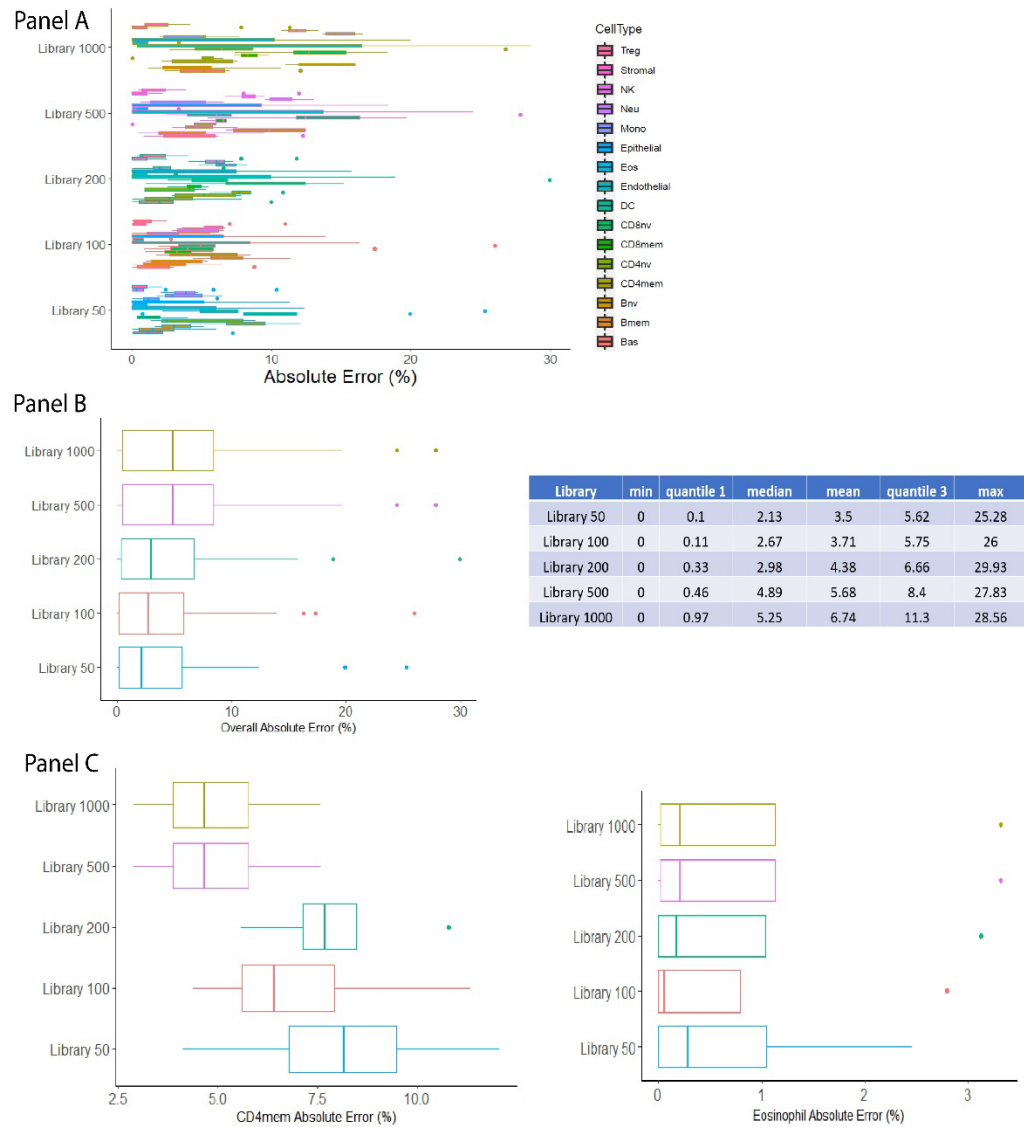

**Supplementary Figure 17.** Performance comparison across iterations on CpGs selected in *HiTIMED* for immune and angiogenic cell projection.
